# Supplementary material
Source: PubMed Central journal article supplement (PMC9856503)
Supplement: jama-e2217045-s001.pdf [file jama-e2217045-s001.pdf]

## Supplemental Online Content

Bruzelius E, Martins SS. US Trends in drug overdose mortality among pregnant and postpartum persons, 2017-2020. *JAMA*. doi:10.1001/jama.2022.17045

**eTable 1.** *ICD-10* codes identifying and classifying pregnancy-associated deaths

**eTable 2.** *ICD-10* codes identifying and classifying drug overdose deaths

This supplemental material has been provided by the authors to give readers additional information about their work.

**eTable 1.** ICD-10 codes identifying and classifying pregnancy-associated deaths

| Definition                                                                            | ICD-10 codes                                                                                                    | Timing                         |
|---------------------------------------------------------------------------------------|-----------------------------------------------------------------------------------------------------------------|--------------------------------|
| Pregnancy with abortive outcome                                                       | O001, O009, O019, O021, O035, O036, O039, O063, O068, O069, O077                                                | Pregnancy                      |
| Other maternal disorders predominantly related to pregnancy                           | O210, O223, O225, O229, O235, O244, O249, O269                                                                  |                                |
| Maternal care related to the fetus and amniotic cavity and possible delivery problems | O364, O441, O459, O460, O468, O469                                                                              |                                |
| Complications of labor and delivery                                                   | O622, O711                                                                                                      |                                |
| Postpartum hemorrhage                                                                 | O720, O721                                                                                                      | Early postpartum               |
| Puerperal sepsis                                                                      | O850                                                                                                            |                                |
| Cardiomyopathy in the puerperium                                                      | O903                                                                                                            |                                |
| Other classification of the puerperium not elsewhere classified                       | O908                                                                                                            |                                |
| Death from causes occurring more than 42 days but less than 1 year from delivery      | O96                                                                                                             | Late postpartum                |
| Death from pregnancy-related causes with indeterminate timing                         | O266, O268, O364, O690, O753, O754, O759, O881, O882, O95, O985, O988, O990, O991, O992, O993, O994, O996, O998 | Indeterminate pregnancy timing |

ICD-10 codes identifying pregnancy-associated deaths were based on the approaches specified by Margerison et al.<sup>3</sup> Early postpartum refers to deaths occurring within 43 days of death. Late postpartum refers to deaths occurring between 43 days to 1-year of death.

**eTable 2.** ICD-10 codes identifying and classifying drug overdose deaths

| Definition                           | ICD-10 codes                                                                                                                                                                 |
|--------------------------------------|------------------------------------------------------------------------------------------------------------------------------------------------------------------------------|
|                                      | Underlying cause-of-death                                                                                                                                                    |
|                                      | X40–44 (unintentional)                                                                                                                                                       |
|                                      | X60–64 (suicide)                                                                                                                                                             |
|                                      | X85 (homicide)                                                                                                                                                               |
|                                      | Y10–14 (undetermined intent)                                                                                                                                                 |
| Drug type                            | Multiple cause cause-of-death                                                                                                                                                |
| Benzodiazepines                      | T42.4 (benzodiazepines)                                                                                                                                                      |
| Fentanyl and other synthetic opioids | T40.4 (synthetic opioids other than methadone)                                                                                                                               |
| Heroin                               | T40.1 (heroin)                                                                                                                                                               |
| Prescription opioids                 | T40.2 (natural opioid analgesics, including morphine and codeine, and semisynthetic opioids, including drugs such as oxycodone, hydrocodone, hydromorphone, and oxymorphone) |
|                                      | T40.3 (methadone)                                                                                                                                                            |
| Psychostimulants                     | T43.6 (psychostimulants with abuse potential, primarily methamphetamine)                                                                                                     |
|                                      | T40.5 (cocaine)                                                                                                                                                              |
| Unspecified                          | T40.6 (other and unspecified narcotics)                                                                                                                                      |

Deaths involving unspecified narcotics (T40.1) were included in calculation of total drug overdose mortality rates but were not separately reported due to National Center for Health Statistics requirements specifying that counts with fewer than 10 observations are suppressed. All deaths specifying other and unspecified narcotics (T40.6) were also captured under other drug type categories (i.e., no record specified T40.6 alone).
